# Supplementary material for: Impact of surgically maximized versus native membranous urethral length on 30-day and long-term pad-free continence after robot-assisted radical prostatectomy
Source: PubMed Central journal article supplement — Prostate Int. 2020 Mar 7;8(2):55–61. doi: 10.1016/j.prnil.2019.12.005 (PMC7336015; doi:10.1016/j.prnil.2019.12.005), 2020-03-07
Supplement: mmc5.pdf [file mmc5.pdf]

**Supplemental Table 2a: Multivariate Regression Model of Variables Predicting 30-Day Continence**

|                                          | B      | S.E.  | Wald  | Sig.  | OR    | 95% CI |        |
|------------------------------------------|--------|-------|-------|-------|-------|--------|--------|
|                                          |        |       |       |       |       | Lower  | Upper  |
| MUL ( $\leq 1.4$ cm [ref] v. $> 1.4$ cm) | 1.579  | 0.695 | 5.157 | 0.023 | 4.851 | 1.241  | 18.961 |
| Age (cont.)                              | -0.078 | 0.030 | 6.910 | 0.009 | 0.925 | 0.873  | 0.980  |
| pGS ( $< 8$ v. 8-10 [ref])               | 0.261  | 0.559 | 0.219 | 0.640 | 1.299 | 0.434  | 3.883  |
| pT2, positive margins                    | 0.200  | 0.437 | 0.209 | 0.647 | 1.221 | 0.519  | 2.873  |
| Pre-op PSA ( $< 10$ v. $> 10$ [ref])     | -0.021 | 0.026 | 0.655 | 0.418 | 0.979 | 0.930  | 1.031  |
| Pre-op IIEF-5 (cont.)                    | 0.021  | 0.034 | 0.399 | 0.528 | 1.021 | 0.956  | 1.091  |
| BMI (cont.)                              | 0.047  | 0.073 | 0.422 | 0.516 | 1.048 | 0.909  | 1.209  |
| Constant                                 | 1.788  | 3.141 | 0.324 | 0.569 | 5.976 |        |        |

**Supplemental Table 2b: Multivariate Regression Model of Variables Predicting 1-Year Continence**

|                                          | B      | S.E.  | Wald  | Sig.  | OR     | 95% CI |         |
|------------------------------------------|--------|-------|-------|-------|--------|--------|---------|
|                                          |        |       |       |       |        | Lower  | Upper   |
| MUL ( $\leq 1.4$ cm [ref] v. $> 1.4$ cm) | 2.421  | 1.201 | 4.065 | 0.044 | 11.255 | 1.070  | 118.407 |
| Age (cont.)                              | -0.085 | 0.072 | 1.368 | 0.242 | 0.919  | 0.797  | 1.059   |
| pGS ( $< 8$ v. 8-10 [ref])               | -0.354 | 1.211 | 0.086 | 0.770 | 0.702  | 0.065  | 7.527   |
| pT2, positive margins                    | -0.534 | 0.971 | 0.303 | 0.582 | 0.586  | 0.087  | 3.934   |
| Pre-op PSA ( $< 10$ v. $> 10$ [ref])     | 0.019  | 0.074 | 0.063 | 0.801 | 1.019  | 0.881  | 1.179   |
| Pre-op IIEF-5 (cont.)                    | 0.099  | 0.069 | 2.059 | 0.151 | 1.104  | 0.964  | 1.264   |
| BMI (cont.)                              | 0.089  | 0.189 | 0.223 | 0.637 | 1.093  | 0.755  | 1.584   |
| Constant                                 | 3.639  | 7.502 | 0.235 | 0.628 | 38.046 |        |         |
